# Transcriptome Sequencing and Comparative Analysis of *Saccharina japonica* (Laminariales, Phaeophyceae) under Blue Light Induction

Yunyan Deng<sup>1,2</sup>, Jianting Yao<sup>1</sup>, Xiuliang Wang<sup>1</sup>, Hui Guo<sup>1,2</sup>, Delin Duan<sup>1\*</sup>

**1** Institute of Oceanology, Chinese Academy of Sciences, Qingdao, China, **2** Graduate University of Chinese Academy of Sciences, Beijing, China

## Abstract

**Background:** Light has significant effect on the growth and development of *Saccharina japonica*, but there are limited reports on blue light mediated physiological responses and molecular mechanism. In this study, high-throughput paired-end RNA-sequencing (RNA-Seq) technology was applied to transcriptomes of *S. japonica* exposed to blue light and darkness, respectively. Comparative analysis of gene expression was designed to correlate the effect of blue light and physiological mechanisms on the molecular level.

**Principal Findings:** RNA-seq analysis yielded 70,497 non-redundant unigenes with an average length of 538 bp. 28,358 (40.2%) functional transcripts encoding regions were identified. Annotation through Swissprot, Nr, GO, KEGG, and COG databases showed 25,924 unigenes compared well (E-value  $<10^{-5}$ ) with known gene sequences, and 43 unigenes were putative BL photoreceptor. 10,440 unigenes were classified into Gene Ontology, and 8,476 unigenes were involved in 114 known pathways. Based on RPKM values, 11,660 (16.5%) differentially expressed unigenes were detected between blue light and dark exposed treatments, including 7,808 upregulated and 3,852 downregulated unigenes, suggesting *S. japonica* had undergone extensive transcriptome re-orchestration during BL exposure. The BL-specific responsive genes were indentified to function in processes of circadian rhythm, flavonoid biosynthesis, photoreactivation and photomorphogenesis.

**Significance:** Transcriptome profiling of *S. japonica* provides clues to potential genes identification and future functional genomics study. The global survey of expression changes under blue light will enhance our understanding of molecular mechanisms underlying blue light induced responses in lower plants as well as facilitate future blue light photoreceptor identification and specific responsive pathways analysis.

**Citation:** Deng Y, Yao J, Wang X, Guo H, Duan D (2012) Transcriptome Sequencing and Comparative Analysis of *Saccharina japonica* (Laminariales, Phaeophyceae) under Blue Light Induction. PLoS ONE 7(6): e39704. doi:10.1371/journal.pone.0039704

**Editor:** Baohong Zhang, East Carolina University, United States of America

**Received:** April 26, 2012; **Accepted:** May 24, 2012; **Published:** June 27, 2012

**Copyright:** © 2012 Deng et al. This is an open-access article distributed under the terms of the Creative Commons Attribution License, which permits unrestricted use, distribution, and reproduction in any medium, provided the original author and source are credited.

**Funding:** This work was funded by the National Natural Science Foundation of China (no. 40976085) and State 863 project (no. 2012AA10A406). The funders had no role in study design, data collection and analysis, decision to publish, or preparation of the manuscript.

**Competing Interests:** The authors have declared that no competing interests exist.

\* E-mail: dlduan@qdio.ac.cn

## Introduction

Light is a crucial environmental factor for growth and development of photosynthetic eukaryotes. Plants deploy sensory photoreceptors that assess and adapt to the quality and quantity of light fluctuations [1,2]. Until now, known photoreceptor classes are the UVB photoreceptors [3,4]; the red/far-red reversible photoreceptors, phytochromes PhyA-PhyE [5]; three blue UVA photoreceptor classes: cryptochromes (CRY1, CRY2 and CRY3) [6,7], phototropins (PHOT1 and PHOT2) [8], aureochromes (AUREO1 and AUREO2) [9,10]. Blue light (BL) photoreceptors govern cellular responses such as photoreactivation, plant development and circadian photoentrainment in bacteria, plants and animals [11]. In marine environment, BL is predominant because shorter and longer light wavelengths could not penetrate sea water mass [12]. There are many reports on BL mediated physiological responses in land plants [13,14], but records on BL regulation of morphogenesis and life history in algae are few and only limited to documents of *Vaucheria* [15,16,17,18,19] and some brown algae [20,21,22].

*Saccharina japonica* (Areschoug) Lane, Mayes, Druehl and Saunders, is one of important commercial seaweed that naturally inhabits sublittoral zones where BL is predominant [23,24]. Previous reports show BL stimulates *Saccharina* gametophyte growth and sporophyte reproduction [25,26,27,28,29,30]. It is implied that BL photoreceptor is involved in the kelp growth and development [27], and hints that prevalent existence of BL photoreceptor in the stramenopiles, which including the Phaeophyceae, Xanthophyceae, Bacillariophyceae, Chrysophyceae and Raphidophyceae. In terms of phylogenetics, stramenopiles differ from green plants and possess new type of BL receptor. Recently the new type of BL receptor, AUREOs, is discovered in photosynthetic stramenopile members *Vaucheria frigida* (Xanthophyceae) and *Fucus distichus* (Phaeophyceae) [9,10], and the conserved motifs of AUREOs are regarded as common and specific function of BL receptor in all stramenopiles [10]. Although BL-mediated physiological responses and morphogenesis changes have been observed in *Saccharina* [31,32], the behavior of the BL receptor gene and its transcription analysis are far from

understanding, especially our knowledge to *Saccharina* genome is limited.

High-throughput RNA-sequencing (RNA-Seq) provides new strategies for analyzing functional complexity of transcriptomes [33,34,35]. So far, it has been used to interrogate eukaryotic transcriptomes of yeast [36,37,38], mice [34,39], humans [40,41,42], *Arabidopsis* [43], *Caenorhabditis elegans* [44], rice [45], *Vitis vinifera* [46], cucumber [47], *Lateolabrax japonicus* [48], maize [49], *Aspergillus oryzae* [50], large yellow croaker [51] and whitefly [52]. Compared with conventional transcriptome analysis approaches, it can quantify absolute gene expressions and provide more insight and accuracy than microarrays analysis [34,35]. Furthermore, unlike hybridization-based approaches, RNA-Seq is not limited to detect transcripts that correspond to existing genomic sequence [33], which enable us more feasible to analysis organisms without genomic information.

In higher plants, light signals perceived by photoreceptors trigger dramatic transcriptome shifts that regulate growth and development [53]. While to algal materials, fewer reports are addressed on the transcriptome analysis under the light treatment [54]. Expression profiling researches indicate that light induces profound gene expression changes in *Arabidopsis* [55,55,56,57,58,60], rice [58,61] *Lotus japonicas* [62], and *Ostreococcus tauri* [54]. These light-responsive genes include many transcription factors and fall into various functional categories mainly involved in photomorphogenesis processes, circadian clock function, DNA repair, photosynthetic light reactions, photorespiration, photosynthetic carbon, metabolism and biosynthesis [53,54,55,56,57,58,59,60,61,62].

For a broad testing the effects of BL induced physiological responses in *S. japonica*, RNA-Seq technology was applied to analysis the kelp transcription profile exposed to BL and darkness respectively, and the dynamic variation of transcriptome was interrogated. Our aim was to decipher transcriptomic changes and related genes behaviors under BL induction as well as verify BL receptor genes and the involved transduction pathway to the lower plants on the transcriptomic level.

## Materials and Methods

### Plant Material

Fresh juvenile sporophytes of *S. japonica* were collected from cultivated rafts in Rongcheng, Shandong, China in March, 2011. Healthy individuals were selected, rinsed with sterilized seawater for several times to remove epiphytes and cultured in constant darkness for 4 h. Washed materials were immersed in sterilized seawater under darkness and blue light for 2 h, respectively. Blue light-emitting diodes (LEDs) of wavelength 460–475 nm (Ichia, Shanghai, Japan) were used as light sources. Detected irradiances of 300–390  $\mu\text{mol photons m}^{-2} \text{s}^{-1}$  were measured with a quantum photometer (LI-COR, LI-250, Nebraska, USA). Cultures were carried out at  $8 \pm 1.0^\circ\text{C}$ . After washing with deionized distilled water, samples were dried with hygroscopic filter paper and frozen immediately in liquid nitrogen.

### Preparation of cDNA Library for RNA-Seq

For each treatment (darkness and BL exposed, respectively), about 100 g fresh algae materials (10 individuals) were mixed for RNA preparation. Total RNA was extracted according to the Yao et al. [63], and was treated with RNase-free DNase I (TaKaRa, Dalian, China) to remove residual genomic DNA. RNA integrity was confirmed via an Agilent Technologies 2100 Bioanalyzer with a minimum RNA integrated numerical value of 7. For each treatment, mRNAs were purified from the 20  $\mu\text{g}$  total RNA using oligo (dT) magnetic beads and fragmented using fragmentation

buffer. Cleaved short RNA fragments were used for first-strand cDNA synthesis using reverse transcriptase and hexamer-primer. Followed by second strand cDNA synthesis using DNA polymerase I and RNase H, cDNA fragments were selected for PCR amplification and cDNA library products were used for sequenced analysis via the Illumina HiSeq<sup>TM</sup> 2000.

### Transcriptome Analysis

Raw sequencing data were deposited in the GEO database at NCBI (accession number GSE33853). Raw reads were cleaned by removing adaptor sequences, empty reads and filtering reads containing unknown nucleotides (Ns) >5, and remaining clean reads were assembled into unigenes using SOAPdenovo [64]. TGICL [65] was used to acquire a single set of non-redundant unigenes. ESTScan [66] was used to analyze the coding sequences (CDs) of unigenes. All the non-redundant unigenes were used for blast search and annotation against the NCBI nr database, SwissProt database, Kyoto Encyclopedia of Genes and Genomes (KEGG) database and Cluster of Orthologous Groups (COG) database with  $10^{-9}$  E-value cutoff. Functional annotation by gene ontology (GO) terms was analyzed using Blast2go program [67]. WEGO [68] was used to classify GO function.

### Identification of Differentially Expressed Genes

RPKM (reads per kilobase per million reads) were used to evaluate expressed value and quantify transcript levels [35]. P value and FDR (false discovery rate) were manipulated to determine differentially expressed unigenes [69]. Assuming that R differentially expressed genes have been selected, S genes really show differential expression, whereas the other V genes are false positives. If error ratio  $Q = V/R < 5\%$ , FDR should be  $\leq 0.05$ . In the present study, unigene,  $P \leq 0.05$ ,  $FDR \leq 0.001$ , absolute value of  $\log_2 \text{Ratio} \geq 1$  and unigene length  $\geq 500$  bp were used as thresholds to assess the different significance of gene expression. For pathway enrichment analysis, all differentially expressed unigenes were mapped to terms in KEGG database and searched for significantly enriched KEGG terms compared to the whole transcriptome background.

### Quantitative Real-time PCR Validation

A total of 11 representative BL response-relevant unigenes (BL receptor, ZTL/FKF1/LKP2, CK2 $\alpha$ , APR 5/APR 7/APR 9, polyketide synthase, COP 9 signalosome complex subunit, DET1 and photolyase homologues) generated by RNA-seq were selected for experimental validation. Real-time quantitative PCR was performed with the SYBR<sup>®</sup> Premix Ex Taq<sup>TM</sup> (TakaRa, Tokyo, Japan) on the Takara TP800 Thermal Cycler Dice<sup>TM</sup> (Takara). First-strand cDNA was synthesized from 2  $\mu\text{g}$  of total RNA as described above and used as a template for real-time PCR with specific primers (File S1).  $\beta$ -actin fragment amplification of *S. japonica* was used as internal control tests. Real-time PCR was performed in volume of 25  $\mu\text{l}$ , and cycling conditions were  $95^\circ\text{C}$  for 30 s, followed by 40 cycles of  $95^\circ\text{C}$  for 5 s,  $50^\circ\text{C}$  for 30 s and  $72^\circ\text{C}$  for 30 s. All reactions were performed in biological triplicates, and the results were expressed relative to the expression levels of  $\beta$ -actin in each sample by using the  $2^{-\Delta\Delta\text{CT}}$  method.

## Results and Discussion

### Raw Reads Processing and Assembly

For the comparisons, two cDNA treatments prepared from dark and BL exposure respectively was sequenced with the Illumina sequencing platform. Raw reads was transformed by base calling from image data output from sequencing machine. After removing

adapters and unknown or low quality bases, approximately 25.32 and 23.96 million clean reads were obtained (File S2). SOAPdenovo [64] was used to assemble clean reads into contigs in which the longest assembled sequences without N. Mapping reads to contigs and combining paired-end information created scaffolds and unknown bases were filled with Ns. After filling gaps in the scaffolds, 83,194 and 56,934 unigenes were generated from darkness and BL exposed treatments. Then removing partial overlapping sequences using CAP3 [70] yielded 70,497 non-redundant unigenes (Table 1). These sequences provided abundant information to further analyze the BL-related genes in *S. japonica*.

### Annotation of Non-redundant Unigenes

To understand the transcriptome of *S. japonica*, we annotated the unigene sets based on sequence homologies to annotated sequences and identified conserved protein domains in other species. ESTscan software analysis showed about 28,358 (40.2% of all distinct unigenes) have reliable coding sequences (CDs) [66]. CD-containing unigenes have high potential for translation into functional proteins and most translated to proteins with >100aa. Comparison with the Nr, Swissprot, KEGG, GO databases established 25,924 unigenes that compared well with known gene sequences (Table 2 and File S3).

GO (Gene Ontology) assignments [71] were applied to classify functions of predicted *S. japonica* unigenes. A total of 10,440 sequences were assigned at least one GO term (Figure 1), among which 6,051 were assigned at least one GO term in the biological process category, 5,460 in the cellular component category and 8,906 in the molecular function category. These unigenes were further classified into functional subcategories. Sequences with GO terms corresponding to the “biological process” group were divided into 24 subcategories, “cellular component” into 8 subcategories, and “molecular function” into 8 subcategories. The largest subcategory found in the “biological process” group was “metabolic process” which comprised 29.1% of the unigenes in the subcategory. In the “cellular component” and “molecular function” categories, “cell” and “catalytic activity” were the most abundant GO terms, making up 36.1% and 50.4% of each subcategory, respectively. In addition, there were high percentages of unigenes in the categories “cell part,” “binding,” “cellular process” and only a few unigenes in “biological adhesion,” “locomotion,” “rhythmic process” and “extracellular region.”

**Table 1.** Distribution of assembled unigenes.

| Length (bp)       | Total Number | Percentage |
|-------------------|--------------|------------|
| 100–500           | 47,293       | 67.09%     |
| 500–1000          | 15,040       | 21.33%     |
| 1000–1500         | 4,638        | 6.58%      |
| 1500–2000         | 1,911        | 2.71%      |
| ≥2000             | 1,615        | 2.29%      |
| Total             | 70,497       |            |
| Total Length (bp) | 37,895,389   |            |
| N50               | 679          |            |
| Mean              | 538          |            |

N50 = median length of all unigenes.

Mean = average length of all unigenes.

doi:10.1371/journal.pone.0039704.t001

To further evaluate the completeness of the transcriptome library and the effectiveness of annotations, we searched annotated sequences for genes involved in COG classifications [72]. COG annotation yielded approximately 9,650 putative proteins in 25 categories (Figure 2). Among those categories, the cluster for “General function prediction” was the largest group (3057, 12.8%), followed by “Translation, ribosomal structure and biogenesis” (2014, 8.5%) and “Transcription” (1914, 8.0%). Clusters for “Nuclear structure” (2, 0.008%), “Extracellular structures” (24, 0.101%) and “RNA processing and modification” (79, 0.332%) were the smallest groups.

Kyoto Encyclopedia of Genes and Genomes (KEGG) database [73] was used to identify the biological pathways in *S. japonica*. A total of 8,476 unigenes were mapped to 114 KEGG pathways. The pathways with most representation by the unique sequences were metabolic pathways (1903 members); spliceosome (901 members) and biosynthesis of secondary metabolites (771 members). These KEGG annotations provided a valuable resource for investigating specific gene functions and pathways in *Saccharina* and strongly supported future kelp genome annotation.

### Detection of BL Response-relevant Gene Sequences

For further insight into BL response in *S. japonica*, response-relevant gene sequences were analyzed. A total of 130 responsive unigenes sequences were obtained, among them 43 were putative BL photoreceptor candidates (Table 3 and File S4), of which 24 unigenes were homologous to known BL photoreceptor genes in higher plant or other algae, including cryptochrome, phototropin and aureochrome. One unigene was homologous to BL photoreceptor gene of bacteria (*Listeria innocua*). These sequences will certainly facilitate further BL photoreceptor genes identification in *Saccharina*.

In addition, 87 other unigenes were found to be homologous to the known BL response-relevant genes (File S5), which are essential components in physiological processes of circadian rhythm (clock-associated PAS protein ZTL, flavin-binding kelch repeat F-box protein 1 (FKF1), LOV kelch protein 2 (LKP2), circadian clock associated protein 1 (CCA1), LHY (LATE ELONGATED HYPOCOTYL), *Arabidopsis* pseudo-response regulator (APR 3, APR 5, APR 7 and APR 9), CK2 $\alpha$  (casein kinase 2, alpha polypeptide), CK2 $\beta$  (casein kinase 2, beta polypeptide), serine/threonine-protein kinase WNK1, zinc finger protein CONSTANS (CO)), flavonoid biosynthesis (polyketide synthase, dihydroflavonol reductase, flavonoid hydroxylase, chalcone isomerase), photoreactivation (photolyase, DNA damage-binding protein, DDB1- and CUL4-associated factor, DET1 (de-etiolated 1)), and photomorphogenesis (COP 9 signalosome complex subunit, DET1). Future molecular and functional characterizations of these candidate genes could help to global identification of BL responsive genes and markers in algae.

### Global Changes in Gene Expression under BL

To characterize the differences of molecular response between the dark and BL treatments, unigene expression levels were calculated by RPKM using the formula [35]:  $RPKM = (10^9 \times C) / (N \times L)$ , where C is the number of reads that uniquely aligned to the gene, N is the total number of reads that uniquely aligned to all genes, L is the sum of the gene in base pairs. The RPKM method eliminates the influence of gene length and sequencing discrepancy in calculating gene expression, allowing direct comparison of gene expression between treatments. Based on RPKM values, 11,660 differentially expressed unigenes (with P value <0.05, FDR  $\leq$ 0.001, fold change value >2 and unigene length  $\geq$ 500 bp) were identified (File S6), including 7,808 upregulated and 3,852

**Table 2.** Annotation of non-redundant unigenes.

| Database  | Number of annotated unigenes | Percentage of annotated unigenes |
|-----------|------------------------------|----------------------------------|
| Swissprot | 15,281                       | 53.89%                           |
| Nr        | 24,514                       | 86.44%                           |
| GO        | 10,440                       | 36.82%                           |
| KEGG      | 8,476                        | 29.89%                           |
| COG       | 9,650                        | 34.03%                           |

All 28,358 CD-containing unigenes revealed by ESTscan were annotated through Swissprot, Nr, GO, KEGG, and COG databases. 25,924 unigenes amongst them compared well (E-value  $< 10^{-5}$ ) with known gene sequences in existing species.  
doi:10.1371/journal.pone.0039704.t002

downregulated unigenes. The large amount of regulated genes (17%) encountered here was in contrast to what has been recorded in *Arabidopsis*, where the proportion of significantly light or BL modified genes generally ranges from 1% to 5% [55,56]. The dramatic expression profile suggested significant transcriptional complexities in *S. japonica* and its extensive transcriptome re-orchestrated during BL induction.

### Functional Annotation of Differentially Expressed Unigenes

All the differentially expressed sequences were mapped to KEGG database terms and compared with the whole transcriptome data, with a view to finding unigenes concerning metabolic or signal transduction pathways that were significantly enriched. Of 8476 unigenes with KEGG annotation, 4671 differentially regulated unigenes were identified between the two treatments. The other 6989 changed unigenes failed to match sequences in the current database and therefore represented potentially novel BL responsive genes. The three-fifths regulated genes functions were

unknown, underlined molecular mechanisms underlying BL responses in lower plants were far from thoroughly understanding. Pathway enrichment analysis revealed that the annotated changes were mainly involved in primary metabolism, transcription, protein processing, cellular transport, biogenesis of cellular components, energy storage, light response and DNA repair (Figure 3 and File S7). These processes included biological pathways that directly or indirectly participated in response, and again reflected the large scale re-orchestrated during short-term acclimation to BL exposure. Some significantly prominent pathways were shown in Table 4.

The extensive transcriptome changes as observed inevitably demanded a multitude of signals for coordination. BL photoreceptor was one of the most possible triggers in the network. As BL activated receptor, it initiated BL signal transduction through the coordinated activation and repression of specific genes and regulated several downstream signaling pathways [6,7,8,9,10,11]. In our study, among the 43 hypothetical BL photoreceptor unigenes (File S4), 28 sequences was highly elevated regulated after BL exposure (File S8), of which 6 genes was upregulated more than 10

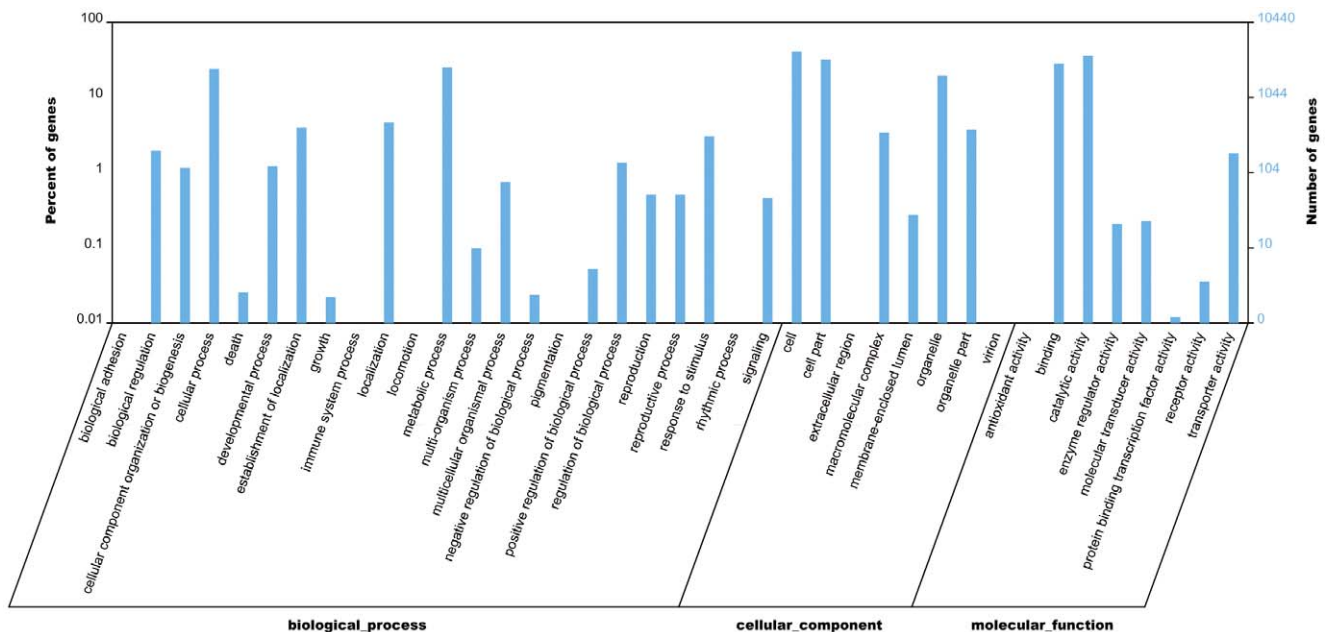

**Figure 1. GO annotation of non-redundant unigenes.** Good hits were aligned to the GO database, and 10,440 transcripts were assigned to at least one GO term. All the unigenes were grouped into three major functional categories, namely biological process, cellular component, and molecular function. The right y-axis indicates the number of unigenes in a category. The left y-axis indicates the percentage of a specific category of unigenes in that main category.  
doi:10.1371/journal.pone.0039704.g001

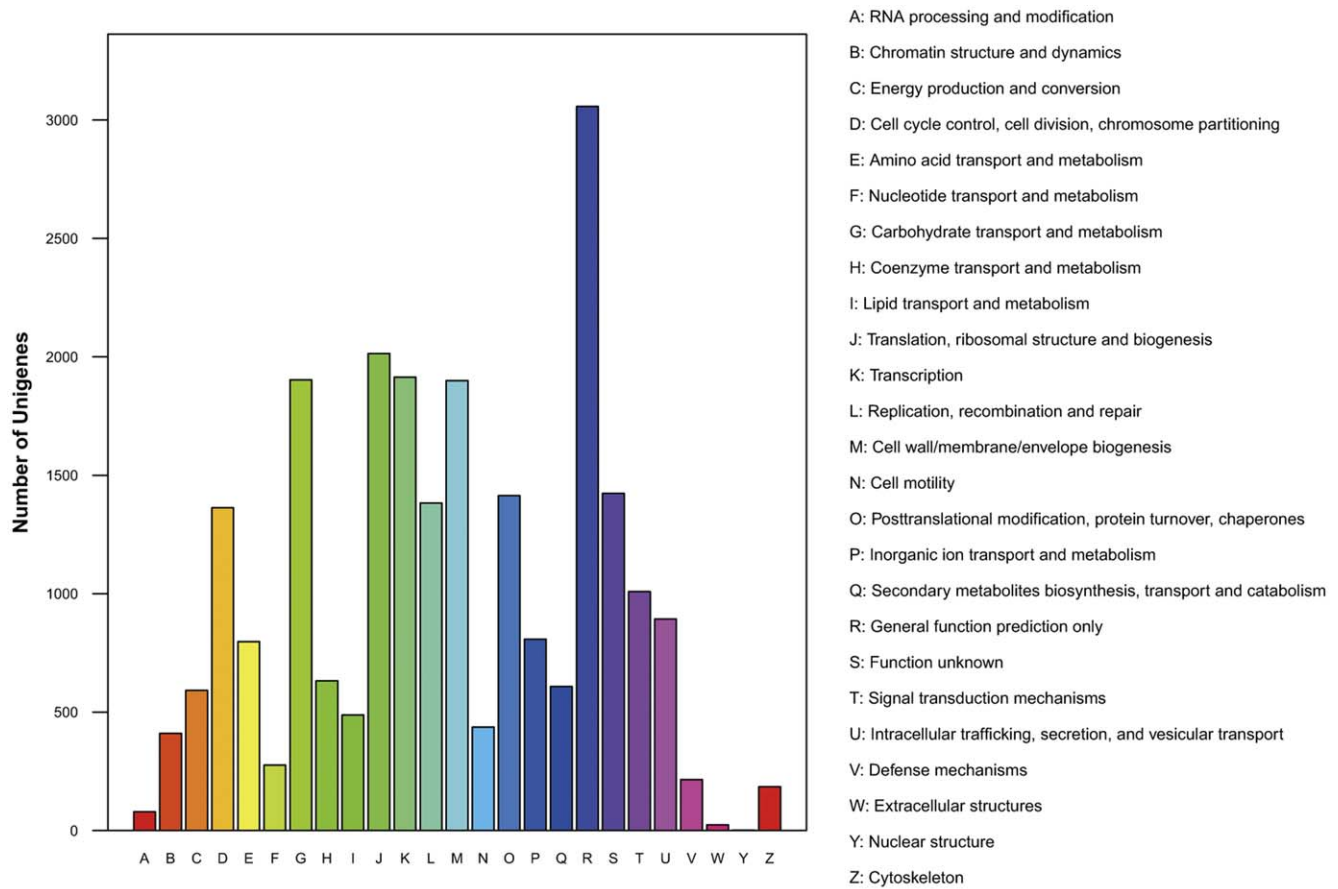

**Figure 2. Histogram presentation of clusters of orthologous groups (COG) classification.** A total of 9,650 sequences have a COG classification among the 25 categories. doi:10.1371/journal.pone.0039704.g002

folds. Increased expression of BL receptor genes was also observed by the real-time PCR (Figure 4A). Since very little information were known on the signal cascades and the relative pathway of BL sensing in algae, these sequences provided important clues for screening putative BL receptors genes and relative transcriptional factors. Besides, 34 BL-specific responsive genes (except the putative BL photoreceptor unigenes) were either found or recognized as important role during the algal circadian rhythm, flavonoid biosynthesis, photoreactivation and photomorphogenesis. We then focused our discussion on these physiological processes and highlighted emerging insights regarding information provided by the regulated sequences.

The circadian rhythm is the temporal oscillation of genetic, metabolic and physiological processes based on the 24 h cycle. It is shaped by alternating day and night cycles and driven through an endogenous timekeeping mechanism [74,75]. Previously, tremendous progress has been made in the molecular mechanisms in *Arabidopsis thaliana* [61], and some deduced proteins related to control TOC1 (TIMING OF CAB EXPRESSION 1) that functioned in constant darkness were considered as key determinants in circadian period of higher plants (Figure 5). To our yielded data, the increased abundances of transcripts of these proteins, including ZTL/FKF1/LKP2, CCA1/LHY, APR 5/APR 7/APR 9, CK2 $\alpha$  and CK2 $\beta$  were detected (Figure 5 and File S9). Quantitative PCR results also

**Table 3. Blue light receptor genes/homologues in *S. japonica*.**

| Blue light receptor gene catalog | The number of unigenes | Homologs number in other species |
|----------------------------------|------------------------|----------------------------------|
| Cryptochrome                     | 7                      | 7                                |
| Phototropin                      | 26                     | 7                                |
| Aureochrome                      | 9                      | 9                                |
| BL receptor in bacteria          | 1                      | 1                                |

doi:10.1371/journal.pone.0039704.t003

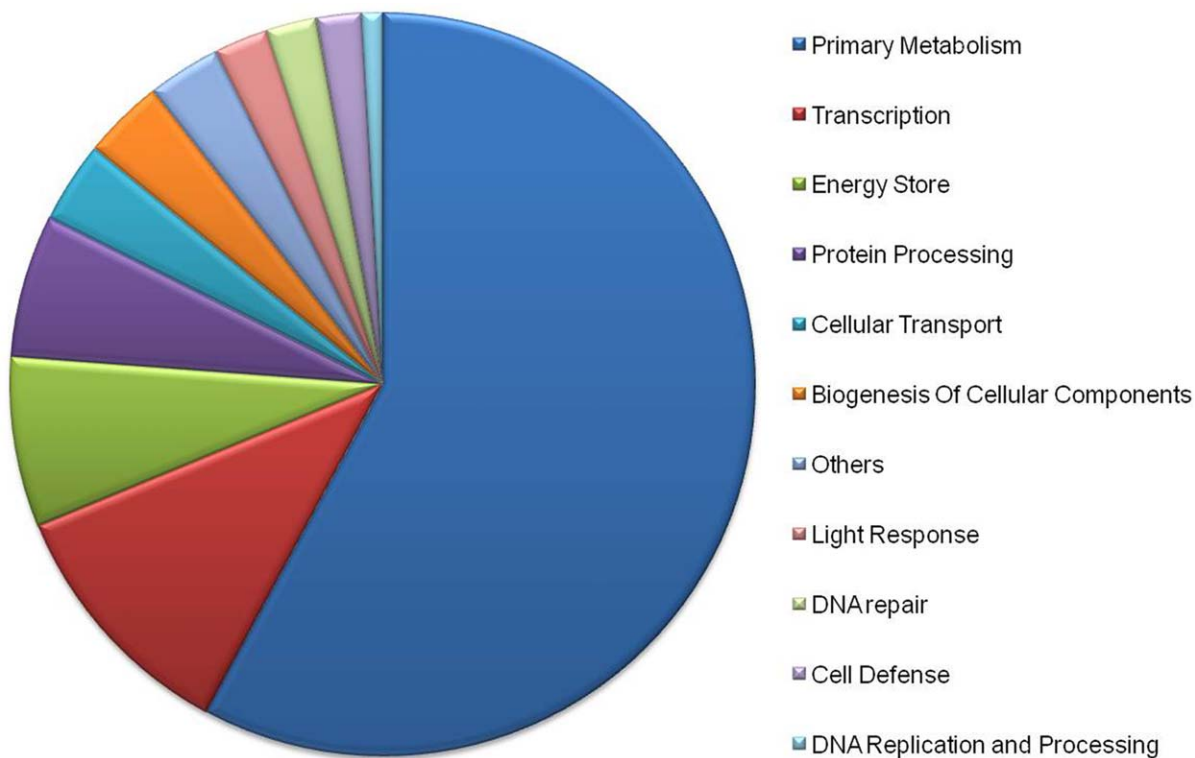

**Figure 3. KEGG functional analyses of the differentially expressed unigenes (data from File S7).**  
doi:10.1371/journal.pone.0039704.g003

demonstrated the upregulation of genes of *ZTL/FKF1/LKP2*, *APR 5/APR 7/APR 9* and *CK2 $\alpha$*  (Figure 4B). Among the total 20 highly expressed transcripts, 13 of them were homologue to *ZEITLUPE* family of putative BL photoreceptor, which consists of PAS-like LOV domain, F box domain and kelch repeats. LOV domain is the molecule responsible for flavin binding in known BL photoreceptors, while the F box motif is found in specific target substrates for proteolytic degradation [76]. In this case, upon BL activation, *ZTL* as component of SCF (Skp/Cullin/F-box) E3 ubiquitin complex recruits *TOC1* for post-translational proteasomal degradation [76,77,78]. Other 5 unigenes, putative *CCA1/LHY* or *CK2 $\alpha$ /CK2 $\beta$*  orthologue, were involved in *CCA1/LHY* mediated transcriptional repression of *TOC1*. *CCA1/LHY* as negative regulator activated by *CK2* (Casein Kinase II) could bind

with the *TOC1* promoter to repress *TOC1* expression [79,80,81]. The other 2 unigenes were paralogues to *TOC1* relatives, *APR5/APR7/APR9*, which are important components for photoperiodic timekeeping and positively regulated by *CCA1/LHY* proteins [82,83]. To our data obtained, 18 of the 20 regulated clock unigenes belonged to the core feedback loop, suggested the BL effects on the kelp clock were predominantly mediated via this part of the oscillator mechanism. In addition, we compiled 48 clock-associated coding sequences in *Saccharina*, which appeared to be orthologous or homologous to the *Arabidopsis* counterparts. A considerable conservation of some elements in circadian rhythm seems exist between *Saccharina* and *Arabidopsis*. Further verification of those homologous sequences is expected to not only deeper understand the kelp photoperiodism properties but also enrich knowledge on molecular mechanism of circadian rhythm in lower plants.

We also noticed elevated transcript abundance of polyketide synthase (*CHS*) (Figure 4C) and dihydroflavonol reductase (*DFR*) (File S10), which are two key enzymes in flavonoid biosynthesis pathway. In higher plants, *CHS* catalyzes the first committed step in the flavonoid biosynthesis and *DFR* is the first enzyme leading to anthocyanidins production. Their expression stimulated by UV/BL were considered to be protective mechanism as which promoted the accumulation of UV-absorbing flavonoids [84]. Here BL stimulated transcription of key enzymes in flavonoid biosynthesis corresponded to that the precious reports on UV/BL induction of flavonoid synthesis in higher plants [84,85]. *Saccharina* naturally inhabit the sublittoral zone, which of rapid changing physical conditions when tides in and off. It is required to exhibit tolerance to various abiotic stressors such as osmotic pressure, temperature and water currents, and the flavonoids might play roles in stresses or UV protection in kelp. It is suspected that UV/BL increases the biosynthesis of flavonoids, which in turn, function

**Table 4. Significantly enriched pathways of differentially expressed unigenes.**

| Pathway category                            | Unigenes No. | %    | Q-value    |
|---------------------------------------------|--------------|------|------------|
| Plant-pathogen interaction                  | 174          | 3.73 | 0.00000019 |
| ABC transporters                            | 77           | 1.65 | 0.00148163 |
| Ribosome                                    | 129          | 2.76 | 0.01365288 |
| Alanine, aspartate and glutamate metabolism | 61           | 1.31 | 0.01896333 |
| alpha-Linolenic acid metabolism             | 29           | 0.62 | 0.06159647 |

Unigenes No. and % indicate the number and the percentage of unigenes in each pathway from 4671 differentially expressed unigenes mapped to KEGG respectively.

doi:10.1371/journal.pone.0039704.t004

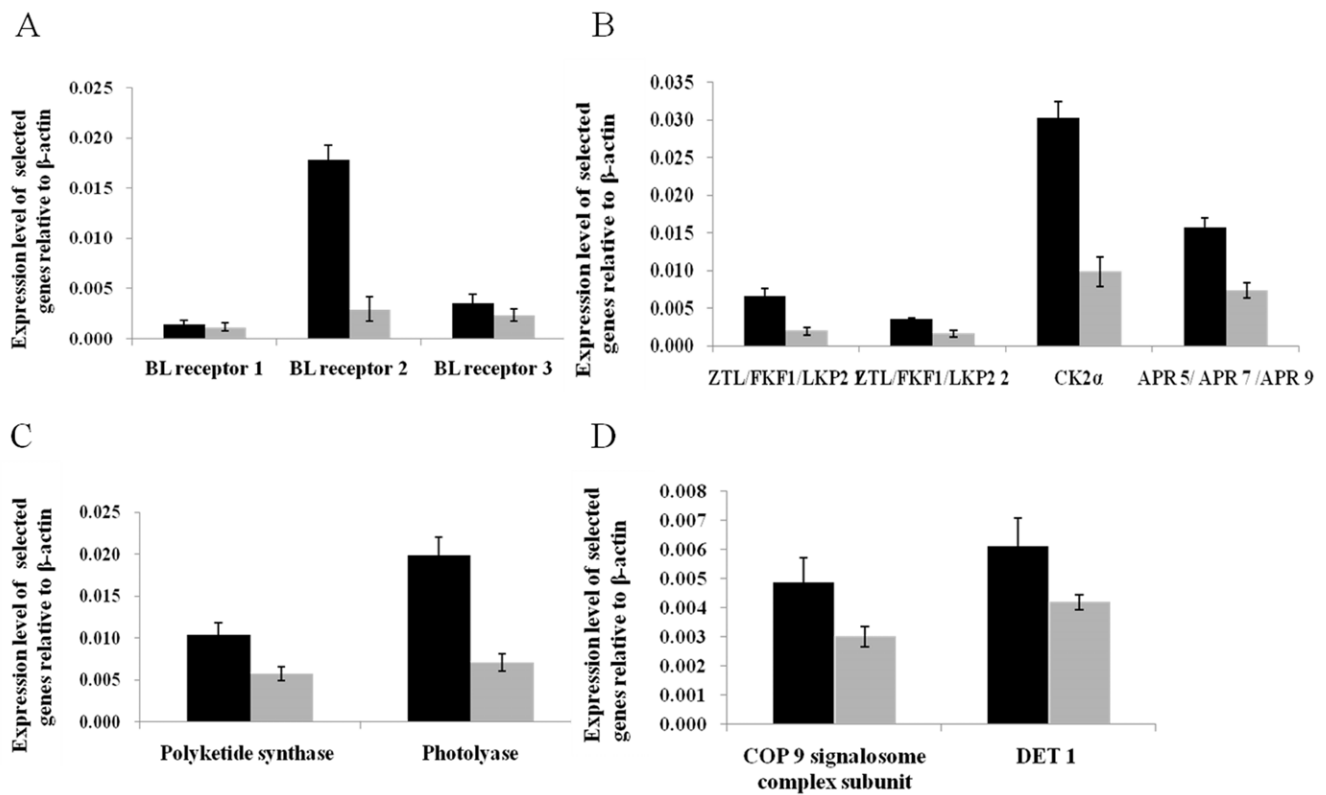

**Figure 4. The expression analysis of selected genes from the RNA-seq by relative quantitative real-time PCR.** Total RNA was extracted from *S. japonica* exposed to BL and darkness, respectively. Real-time PCR was used to validate gene expression changes of putative BL photoreceptors (A) and in pathways of circadian rhythm (B), flavonoid biosynthesis and photoreactivation pathways (C), and photomorphogenesis (D). Increases and decreases in relative levels of transcripts with respect to the control 18 S gene are shown. For each gene, the black bar indicates the gene expression ratio of kelp exposed to BL; the grey bar indicates the expression ratio of kelp exposed to darkness. Values are mean  $\pm$  standard deviation.

doi:10.1371/journal.pone.0039704.g004

in stresses or UV protection in *S. japonica*, future experiments are required to test this hypothesis.

Photoreactivation is a repair process of DNA pyrimidine dimers that results from UV-B light exposure [86]. It is catalyzed by BL dependent enzymes photolyases [87]. In our study, 16 transcripts of genes implicated in photoreactivation were detected (File S5), and 9 sequences of them exhibited different expression under BL exposure (File S11). One sequence (Unigene7340) homologous to photolyase was upregulated 2.8 fold after BL induction in our quantitative PCR, which was consistent with its nearly 2 folds elevated expression in RNA-seq (Figure 4C). The other 8 sequences including genes encoding DDB1- and CUL4-associated factor, DET 1 (de-etiolated 1) and DNA damage-binding protein. DET1 is a nuclear protein conserved to higher plants. In *Arabidopsis*, DET1 associated with factors of the poly-ubiquitination pathway (such as CUL4) and with the DNA repair pathway via DDB1 [88,89]. Previously, photoreactivation have mainly been studied in virus, bacteria, fungi and higher plant, and very few works focused on algae. Whitaker first reported *Fucus furcatus* Gardner on the reactivation of UV inhibited rhizoid formation [90]. Followed damaging UV effects on *Acetabularia*, *Alaria* and *Saccharina (Laminaria)* photoreactivated were recorded, and BL was higher effective than white, green or red light in these processes [91,92,93]. Han and Kain inferred a BL absorbing photolyase was involve in the BL induced reactivation of UV-irradiated damages in brown algae [92,93]. Our results confirmed their deduction, and suggested that the DNA damage genes were not only triggered

by UV exposure, but also responded to BL. The 9 upregulated unigenes were extremely related to the early stage of the BL mediated DNA repair in juvenile sporophytes of *S. japonica*.

Photomorphogenesis is a serial of developmental changes in growth and differentiation upon the exposure to light [1]. In higher plants, CRYs are the mainly BL photoreceptors involved in the process [86,87]. Here we encountered 5 unigenes associated with kelp photomorphogenesis (File S5). One of them (Unigene 48767) was found to be homolog of DET1, a photomorphogenesis repressor, controls several genes in darkness in higher plant [94]. The other 4 sequences were homologous to subunit of COP9 signalosome complex, which is another repressor of photomorphogenesis in *Arabidopsis* [95]. As a component of ubiquitin-proteasome pathway, COP9 signalosome complex participates in targeted degradation of key transcription factors that regulates the photoresponsive genes expression [1]. HY5, a constitutive nuclear bZIP transcription factor, function positively in photomorphogenic development by binding to the promoters of light-inducible genes, is a primary target of this pathway. Previous studies showed that COP9 complex was highly conserved in mammals and higher plants [95,96]. Our results indicated that it was also conserved in algal phylum. However, no other homolog of signaling components in higher plants photomorphogenesis was identified in our data set, suggesting poor conservation of photomorphogenic basic elements existed between the lower plant-kelp and higher plant. Besides, the DET1 sequence and one COP9 subunit homology were prominent expressed in the BL relative to dark treatment





**File S10** 3 significant differentially expressed unigenes in flavonoid biosynthesis pathway in *S. japonica*. (DOC)

**File S11** 9 significant differentially expressed unigenes related to blue light induced photoreactivation in *S. japonica*. (DOC)

**File S12** 2 significant differentially expressed unigenes related to blue light induced photomorphogenesis in *S. japonica*. (DOC)

## References

- Quail PH (2002a) Phytochrome photosensory signalling networks. *Nature Reviews Molecular Cell Biology* 3: 85–93.
- Quail PH (2002b) Photosensory perception and signalling in plant cells: new paradigms? *Current Opinion in Cell Biology* 14: 180–188.
- Beggs CJ, Wellmann E (1994) Photocontrol of flavonoid biosynthesis. In: Kendrick RE, Kronenberg GHM, editors. *Photomorphogenesis in Plants*. 2nd Edition. Netherlands: Kluwer Academic Publishers. 733–751.
- Björn LO, Wang T (2001) Is provitamin D a UV-B receptor in plants? *Plant Ecology* 154: 1–8.
- Mathews S, Sharrock RA (1997) Phytochrome gene diversity. *Plant Cell and Environment* 20: 666–671.
- Lin C, Shalitin D (2003) Cryptochrome structure and signal transduction. *Annual Review of Plant Biology* 54: 469–496.
- Brudler R, Hitomi K, Daiyasu H, Toh H, Kucho K, et al. (2003) Identification of a new cryptochrome class. Structure, function, and evolution. *Molecular Cell* 11: 59–67.
- Briggs WR, Beck CF, Cashmore AR, Christie JM, Hughes J, et al. (2001) The phototropin family of photoreceptors. *The Plant Cell* 13: 993–997.
- Takahashi F, Yamagata D, Ishikawa M, Fukamatsu Y, Ogura Y, et al. (2007) AUREOCHROME, a photoreceptor required for photomorphogenesis in stramenopiles. *Proc Natl Acad Sci USA* 104: 19625–19630.
- Ishikawa M, Takahashi F, Nozaki H, Nagasato C, Motomura T, et al. (2009) Distribution and phylogeny of the blue light receptors aureochromes in eukaryotes. *Planta* 230: 543–552.
- Thompson CL, Sancar A (2002) Photolyase/cryptochrome blue-light photoreceptors use photon energy to repair DNA and reset the circadian clock. *Oncogene* 21: 9043–9056.
- Kirk JTO (1994) *Light and Photosynthesis in Aquatic Ecosystems*. 2nd Ed. Cambridge: Cambridge University Press.
- Hendricks SB, WJ van der Woude (1983) How phytochrome acts—perspectives on the continuing quest. In Shropshire W, Mohr H, editors. *Photomorphogenesis*, *Encyclopedia of Plant Physiology*, Vol 16A. New York: Springer-Verlag. 4–23.
- Hegemann P (2008) Algal sensory photoreceptors. *Annual Review of Plant Biology* 59: 167–189.
- Kataoka H (1975a) Phototropism in *Vaucheria geminata* I. The action spectrum. *Plant Cell Physiology* 16: 427–437.
- Kataoka H (1975b) Phototropism in *Vaucheria geminata* II. The mechanism of bending and branching. *Plant Cell Physiology* 16: 439–448.
- Kataoka H (1990) Negative phototropism of *Vaucheria terrestris* regulated by calcium. II. Inhibition by  $Ca^{2+}$ -channel blockers and mimesis by A23187. *Plant Cell Physiology* 31: 933–940.
- Takahashi F, Hishinuma T, Kataoka H (2001) Blue light-induced branching in *Vaucheria*. Requirement of nuclear accumulation in the irradiated region. *Plant Cell Physiology* 42: 274–285.
- Nutsch W (1956) Studien über die Phototaxis der Diatomeen. *Archiv für Protistenkunde* 101: 1–68.
- Jaffe LF (1958) Tropic responses of zygotes of the Fucaecae to polarized light. *Experimental cell research* 15: 282–299.
- Kropf DL (1997) Induction of polarity in fucoid zygotes. *Plant Cell* 9: 1011–1020.
- Lüning K (1980) Critical levels of light and temperature regulating the gametogenesis of three *Laminaria* species (phaeophyceae). *Journal of Phycology* 16: 1–15.
- Tseng CK (2001) Algal biotechnology industries and research activities in China. *Journal of Applied Phycology* 13: 375–380.
- Dring MJ (1981) Chromatic adaptation of photosynthesis in benthic marine algae: an examination of its ecological significance using a theoretical model. *Limnology and Oceanography* 26: 271–284.
- Lüning K, Dring MJ (1972) Reproduction induced by blue light in female gametophytes of *Laminaria saccharina*. *Planta* 104: 252–256.
- Lüning K (1975) Reproduction, growth and photosynthesis of gametophytes of *Laminaria saccharina* grown in blue and red light. *Marine Biology* 29: 195–200.
- Shi CJ, Kataoka H, Duan DL (2005) Effects of blue light on gametophyte development of *Laminaria japonica* (Laminariales, Phaeophyta). *Chinese Journal of Oceanology and Limnology* 23: 323–329.
- Dring MJ (1989) Stimulation of light-saturated photosynthesis in *Laminaria* (Phaeophyta) by blue light. *Journal of Phycology* 25: 254–258.
- Forster RM, Dring MJ (1992) Interaction of blue light and inorganic carbon supply in the control of light-saturated photosynthesis in brown algae. *Plant Cell and Environment* 15: 241–247.
- Forster RM, Dring MJ (1994) Influence of blue light on the photosynthetic capacity of marine plants from different taxonomic, ecological and morphological groups. *European Journal of Phycology* 29: 21–27.
- Wang WJ, Sun XT, Wang FJ (2010) Effect of blue light on early sporophyte development of *Saccharina japonica* (Phaeophyta). *Marine Biology* 157: 1811–1817.
- Lüning K (1980) Critical levels of light and temperature regulating the gametogenesis of the three *Laminaria* species (Phaeophyceae). *Journal of Phycology* 16: 1–15.
- Wang Z, Gerstein M, Snyder M (2009) RNA-Seq: a revolutionary tool for transcriptomics. *Nature Reviews Genetics* 10: 57–63.
- Mortazavi A, Williams BA, McCue K, Schaefer L, Wold B (2008) Mapping and quantifying mammalian transcriptomes by RNA-Seq. *Nature Methods* 5: 621–628.
- Marioni JC, Mason CE, Mane SM, Stephens M, Gilad Y. (2008) RNA-seq: an assessment of technical reproducibility and comparison with gene expression arrays. *Genome Research* 18: 1509–1517.
- Nagalakshmi U, Wang Z, Waern K, Shou C, Raha D, et al. (2008) The transcriptional landscape of the yeast genome defined by RNA sequencing. *Science* 320: 1344–1349.
- Wilhelm BT, Marguerat S, Watt S, Schubert F, Wood V, et al. (2008) Dynamic repertoire of a eukaryotic transcriptome surveyed at single-nucleotide resolution. *Nature* 453: 1239–1243.
- Yassour M, Kaplan T, Fraser HB, Levin JZ, Pfiffner J, et al. (2009) Ab initio construction of a eukaryotic transcriptome by massively parallel mRNA sequencing. *Proc Natl Acad Sci USA* 106: 3264–3269.
- Cloonan N, Forrest ARR, Kolle G, Gardiner BBA, Faulkner GJ, et al. (2008) Stem cell transcriptome profiling via massive-scale mRNA sequencing. *Nature Methods* 5: 613–619.
- Pan Q, Shai O, Lee IJ, Frey J, Blencowe BJ (2008) Deep surveying of alternative splicing complexity in the human transcriptome by high-throughput sequencing. *Nature Genetics* 40: 1413–1415.
- Sultan M, Schulz MH, Richard H, Magen A, Klingenhoff A, et al. (2008) A global view of gene activity and alternative splicing by deep sequencing of the human transcriptome. *Science* 321: 956–960.
- Wang ET, Sandberg R, Luo S, Khrebtkova I, Zhang L, et al. (2008) Alternative isoform regulation in human tissue transcriptomes. *Nature* 456: 470–476.
- Lister R, O' Malley RC, Tonti-Filippini J, Gregory BD, Berry CC, et al. (2008) Highly integrated single-base resolution maps of the epigenome in *Arabidopsis*. *Cell* 133: 523–536.
- Hillier LW, Reinke V, Green P, Hirst M, Marra MA, et al. (2009) Massively parallel sequencing of the polyadenylated transcriptome of *C. elegans*. *Genome Research* 19: 657–666.
- Zhang G, Guo G, Hu X, Zhang Y, Li Q, et al. (2010) Deep RNA sequencing at single base-pair resolution reveals high complexity of the rice transcriptome. *Genome Research* 20: 646–654.
- Zenoni S, Ferrarini A, Giacomelli E, Xumerle L, Fasoli M, et al. (2010) Characterization of transcriptional complexity during Berry development in *Vitis vinifera* using RNA-seq. *Plant Physiology* 152: 1787–1795.
- Guo SG, Zheng Y, Joung JG, Liu SQ, Zhang ZH, et al. (2010) Transcriptome sequencing and comparative analysis of cucumber flowers with different sex types. *BMC Genomics* 11: 384.
- Xiang LX, He D, Dong WR, Zhang YW, Shao JZ (2010) Deep sequencing-based transcriptome profiling analysis of bacteria-challenged *Lateolabrax japonicus* reveals insight into the immune-relevant genes in marine fish. *BMC Genomics* 11: 472.
- Li PH, Ponnala L, Gandotra N, Wang L, Si YQ, et al. (2010) The developmental dynamics of the maize leaf transcriptome. *Nature Genetics* 42: 1060–1067.

## Acknowledgments

We thank Jidong Liu, Wei Li for *Saccharina japonica* samples collection and Zhanru Shao, Haining Zhang, Xiacong Liao for the help in total RNA extraction. We would like to extend our gratitude to two anonymous reviewers for helpful comments.

## Author Contributions

Conceived and designed the experiments: YD JY XW DD. Performed the experiments: YD HG. Analyzed the data: YD JY XW DD. Contributed reagents/materials/analysis tools: YD JY. Wrote the paper: YD DD.

50. Wang B, Guo GW, Wang C, Lin Y, Wang XN, et al. (2010) Survey of the Transcriptome of *Aspergillus oryzae* via Massively Parallel mRNA Sequencing. *Nucleic Acids Research* 38: 5075–5087.
51. Mu YN, Ding F, Cui P, Ao JQ, Hu SN, et al. (2010) Transcriptome and expression profiling analysis revealed changes of multiple signaling pathways involved in immunity in the large yellow croaker during *Aeromonas hydrophila* infection. *BMC Genomics* 11: 506.
52. Wang XW, Luan JB, Li JM, Bao YY, Zhang CX, et al. (2010) De novo characterization of a whitefly transcriptome and analysis of its gene expression during development. *BMC Genomics* 11: 400.
53. Casal JJ, Yanovsky MJ (2005) Regulation of gene expression by light. *International Journal of Developmental Biology* 49: 501–511.
54. Monnier A, Liverani S, Bouvet R, Jesson B, Smith J, et al. (2010) Orchestrated transcription of biological processes in the marine picoeukaryote *Ostreococcus* exposed to light/dark cycles. *BMC Genomics* 11: 192.
55. Ma L, Li J, Qu L, Hager J, Chen Z, et al. (2001) Light control of *Arabidopsis* development entails coordinated regulation of genome expression and cellular pathways. *Plant Cell* 13: 2589–2607.
56. Tepperman JM, Zhu T, Chang HS, Wang X, Quail PH (2001) Multiple transcription-factor genes are early targets of phytochrome A signalling. *Proc Natl Acad Sci USA* 98: 9437–9442.
57. Folta KM, Pontin MA, Karlin-Neumann G, Bottini R, Spalding EP (2003) Genomic and physiological studies of EARLY CRYPTOCHROME 1 action demonstrate roles for auxin and gibberellin in the control of hypocotyl growth by blue light. *Plant Journal* 36: 203–214.
58. Jiao Y, Ma L, Strickland E, Deng XW (2005) Conservation and divergence of light-regulated genome expression patterns during seedling development in rice and *Arabidopsis*. *Plant Cell* 17: 3239–3256.
59. Zhang XN, Wu Y, Tobias JW, Brunk BP, Deitzer GF, et al. (2008) HFR1 is crucial for transcriptome regulation in the cryptochrome 1-mediated early response to blue light in *Arabidopsis thaliana*. *PLoS ONE* 3(10): e3563. doi: 10.1371/journal.pone.0003563.
60. Lehmann P, Nöthen J, Schmidt von Braun S, Bohnsack MT, et al. (2011) Transitions of gene expression induced by short-term blue light. *Plant Biology* 13: 349–361.
61. Jung K-H, Lee J, Dardick C, Seo Y-S, Cao P, et al. (2008) Identification and functional analysis of light-responsive unique genes and gene family members in rice. *PLoS Genet* 4(8): e1000164. doi: 10.1371/journal.pgen.1000164.
62. Ono N, Ishida K, Yamashino T, Nakanishi H, Sato S, et al. (2010) Genomewide characterization of the light-responsive and clock-controlled output pathways in *Lotus japonicus* with special emphasis of its uniqueness. *Plant Cell Physiology* 51: 1800–1814.
63. Yao JT, Fu WD, Wang XL, Duan DL (2008) Improved RNA Isolation for *Laminaria japonica* Aresch (Laminariaceae, Phaeophyta). *Journal of Applied Phycology* 21: 233–238.
64. Li R, Ruan J, Qian W, Fang X, Shi Z, et al. (2009) De novo assembly of human genomes with massively parallel short read sequencing. *Genome Research* 20: 265–272.
65. Pertea G, Huang X, Liang F, Antonescu V, Sultana R, et al. (2003) TIGR Gene Indices clustering tools (TGICL): a software system for fast clustering of large EST datasets. *Bioinformatics* 19: 651–652.
66. Iseli C, Jongeneel CV, Bucher P (1999) ESTScan: a program for detecting, evaluating, and reconstructing potential coding regions in EST sequences. In *Proceeding of the Intelligent System for Molecular Biology*. CA: AAAI Press. 138–148.
67. Conesa A, Gotz S, Garcia-Gomez JM, Terol J, Talon M, et al. (2005) Blast2GO: a universal tool for annotation, visualization and analysis in functional genomics research. *Bioinformatics* 21: 3674–3676.
68. Ye J, Fang L, Zheng H, Zhang Y, Chen J, et al. (2006) WEGO: a web tool for plotting GO annotations. *Nucleic Acids Research* 34: W293–297.
69. Benjamini Y, Drai D, Elmer G, Kafkafi N, Golani I (2001) Controlling the false discovery rate in behavior genetics research. *Behavioural Brain Research* 125: 279–284.
70. Huang X, Madan A (1999) CAP3: A DNA sequence assembly program. *Genome Research* 9: 868–877.
71. Ashburner M, Ball CA, Blake JA, Botstein D, Butler H, et al. (2000) Gene Ontology: tool for the unification of biology. *The Gene Ontology Consortium*. *Nature Genetics* 25: 25–29.
72. Tatusov RL, Galperin MY, Natale DA, Koonin EV (2008) The COG database: a tool for genome-scale analysis of protein functions and evolution. *Nucleic Acids Research* 28: 33–36.
73. Kanehisa M, Goto S (2000) KEGG: Kyoto Encyclopedia of Genes and Genomes. *Nucleic Acids Research* 28: 27–30.
74. Bunnning E (1967) *The Physiological Clock*. New York: The Heidelberg Science Library.
75. Pittendrigh CS (1993) Temporal organization: reflections of a Darwinian clock-watcher. *Annual Review of Physiology* 55: 16–54.
76. Somers DE, Schultz TF, Milnamow M, Kay SA (2000) ZEITLUPE encodes a novel clock-associated PAS protein from *Arabidopsis*. *Cell* 101: 319–329.
77. Más P, Kim WY, Somers DE, Kay SA (2003) Targeted degradation of TOC1 by ZTL modulates circadian function in *Arabidopsis thaliana*. *Nature* 426: 567–570.
78. Han L, Mason M, Risseuw EP, Crosby WL, Somers DE (2004) Formation of an SCF<sup>ZTL</sup> complex is required for proper regulation of circadian timing. *The Plant Journal* 40: 291–301.
79. Sugano S, Andronis C, Green RM, Wang ZY, Tobin EM (1998) Protein kinase CK2 interacts with and phosphorylates the *Arabidopsis* circadian clock-associated 1 protein. *Proc Natl Acad Sci USA* 95: 11020–11025.
80. Sugano S, Andronis C, Ong MS, Green RM, Tobin EM (1999) The protein kinase CK2 is involved in regulation of circadian rhythms in *Arabidopsis*. *Proc Natl Acad Sci USA* 96: 12362–12366.
81. Alabadi D, Oyama T, Yanovsky MJ, Harmon FG, Más P, et al. (2001) Reciprocal regulation between TOC1 and LHY/CCA1 within the *Arabidopsis* circadian clock. *Science* 293: 880–883.
82. Harmer SL, Kay SA (2005) Positive and negative factors confer phase-specific circadian regulation of transcription in *Arabidopsis*. *Plant Cell* 17: 1926–1940.
83. Mizuno T, Nakamichi N (2005) Pseudo-response regulators (PRRs) or true oscillator components (TOCs). *Plant Cell Physiology* 46: 677–685.
84. Jenkins GI, Long JC, Wade HK, Shenton MR, Bibikova TN (2001) UV and blue light signalling: pathways regulating chalcone synthase gene expression in *Arabidopsis*. *New Phytologist* 151: 121–131.
85. Fuglevand G, Jackson JA, Jenkins GI (1996) UV-B, UV-A and blue light signal transduction pathways interact synergistically to regulate chalcone synthase gene expression in *Arabidopsis*. *Plant Cell* 8: 2347–2357.
86. Cashmore AR, Jarillo JA, Wu YJ, Liu DM (1999) Cryptochromes: blue light receptors for plants and animals. *Science* 284: 760–765.
87. Lin C, Shalitin D (2003) Cryptochrome structure and signal transduction. *Annual Review of Plant Biology* 54: 469–496.
88. Bernhardt A, Lechner E, Hano P, Schade V, Dieterle M, et al. (2006) CUL4 associates with DDB1 and DET1 and its downregulation affects diverse aspects of development in *Arabidopsis thaliana*. *Plant Journal* 47: 591–603.
89. Hu J, McCall CM, Ohta T, Xiong Y (2004) Targeted ubiquitination of CDT1 by the DDB1-CUL4A-ROC1 ligase in response to DNA damage. *Nature Cell Biology* 6: 1003–1009.
90. Whitaker DM (1942) Counteracting the retarding and inhibitory effects of strong ultraviolet on *Fucus* eggs by white light. *Journal of General Physiology* 25: 391–397.
91. Dazy AC, Puisieux-dao S, Borghi H (1989) The effects of blue and red light on *Acetabularia mediterranea* after long exposure to darkness. *Biology of the Cell* 67(2): 227–234.
92. Han T, Kain JM (1992) Blue light sensitivity of UV-irradiated young sporophytes of *Laminaria hyperborean*. *Journal of Experimental Marine Biology and Ecology* 158(2): 219–230.
93. Han T, Kain JM (1993) Blue light photoreactivation in ultraviolet-irradiated young sporophytes of *Alaria esculenta* and *Laminaria saccharina* (Phaeophyta). *Journal of Phycology* 29: 79–81.
94. Pepper A, Delaney T, Washburn T, Poole D, Chory J. (1994) DET1, a negative regulator of light-mediated development and gene expression in *Arabidopsis*, encodes a novel nuclear-localized protein. *Cell* 78: 109–116.
95. Schwechheimer C, Deng XW (2001). COP9 signalosome revisited: a novel mediator of protein degradation. *TRENDS in Cell Biology* 11: 420–426.
96. Wei N, Tsuge T, Serino G, Dohmac N, Takio K, et al. (1998) The COP9 complex is conserved between plants and mammals and is related to the 26 S proteasome regulatory complex. *Current Biology* 8: 919–922.
