# Supplementary material for: Transcriptome Sequencing and Comparative Analysis of Saccharina japonica (Laminariales, Phaeophyceae) under Blue Light Induction
Source: PLoS One. 2012 Jun 27;7(6):e39704. doi: 10.1371/journal.pone.0039704 (PMC3384632; doi:10.1371/journal.pone.0039704)
Supplement: File S5 — Summary of 87 blue light response-relevant genes/homologues in S. japonica. (XLS) [file pone.0039704.s005.xls]

## Sheet: file 4
File S5 Summary of 87 BL response-relevant genes/homologues in S. japonica
	Catalogs	Query_id	Query_length	Subject_id	Score	E_value	Subject_annotation
Circadian rhythm - plant	clock-associated PAS protein ZTL	Unigene19749	546	ath:AT5G57360	163	9e-16	ZTL (ZEITLUPE); K12115 clock-associated PAS protein ZTL
		Unigene21263	1060	ath:AT5G57360	130	8e-09	ZTL (ZEITLUPE); K12115 clock-associated PAS protein ZTL
		Unigene35321	1125	ath:AT5G57360	112	2e-10	ZTL (ZEITLUPE); K12115 clock-associated PAS protein ZTL
		Unigene46429	390	ath:AT5G57360	129	2e-07	ZTL (ZEITLUPE); K12115 clock-associated PAS protein ZTL
		Unigene47495	1147	ath:AT5G57360	129	6e-15	ZTL (ZEITLUPE); K12115 clock-associated PAS protein ZTL
		Unigene47823	906	ath:AT5G57360	113	3e-06	ZTL (ZEITLUPE); K12115 clock-associated PAS protein ZTL
		Unigene49100	715	ath:AT5G57360	121	7e-15	ZTL (ZEITLUPE); K12115 clock-associated PAS protein ZTL
		Unigene63416	296	ath:AT5G57360	94	4e-09	ZTL (ZEITLUPE); K12115 clock-associated PAS protein ZTL
		Unigene69770	613	ath:AT5G57360	109	7e-07	ZTL (ZEITLUPE); K12115 clock-associated PAS protein ZTL
		Unigene70482	1693	ath:AT5G57360	112	3e-10	ZTL (ZEITLUPE); K12115 clock-associated PAS protein ZTL
		Unigene7649	393	ath:AT5G57360	95	2e-11	ZTL (ZEITLUPE); K12115 clock-associated PAS protein ZTL
		Unigene9115	1165	ath:AT5G57360	214	9e-06	ZTL (ZEITLUPE); K12115 clock-associated PAS protein ZTL
		Unigene10687	576	ath:AT5G57360	114	2e-12	ZTL (ZEITLUPE); K12115 clock-associated PAS protein ZTL
		Unigene11320	1760	ath:AT5G57360	115	6e-12	ZTL (ZEITLUPE); K12115 clock-associated PAS protein ZTL
		Unigene14139	768	ath:AT5G57360	114	5e-11	ZTL (ZEITLUPE); K12115 clock-associated PAS protein ZTL
		Unigene14632	815	ath:AT5G57360	114	4e-09	ZTL (ZEITLUPE); K12115 clock-associated PAS protein ZTL
	FKF1 (flavin-binding kelch repeat F-box protein 1)	Unigene19749	546	osa:4350698	107	1e-13	flavin-binding kelch repeat F-box protein 1;K12116
		Unigene21263	1060	osa:4350698	286	6e-09	flavin-binding kelch repeat F-box protein 1;K12116
		Unigene35321	1125	osa:4350698	135	2e-09	flavin-binding kelch repeat F-box protein 1;K12116
		Unigene46429	390	osa:4350698	129	9e-08	flavin-binding kelch repeat F-box protein 1;K12116
		Unigene47495	1147	osa:4350698	110	7e-14	flavin-binding kelch repeat F-box protein 1;K12116
		Unigene47823	906	osa:4350698	114	4e-06	flavin-binding kelch repeat F-box protein 1;K12116
		Unigene49100	715	osa:4350698	107	2e-12	flavin-binding kelch repeat F-box protein 1;K12116
		Unigene63416	296	osa:4350698	102	2e-07	flavin-binding kelch repeat F-box protein 1;K12116
		Unigene69770	613	osa:4350698	115	2e-06	flavin-binding kelch repeat F-box protein 1;K12116
		Unigene70482	1693	osa:4350698	135	3e-09	flavin-binding kelch repeat F-box protein 1;K12116
		Unigene7649	393	osa:4350698	87	1e-08	flavin-binding kelch repeat F-box protein 1;K12116
		Unigene9115	1165	osa:4350698	226	7e-08	flavin-binding kelch repeat F-box protein 1;K12116
		Unigene10687	576	osa:4350698	107	5e-11	flavin-binding kelch repeat F-box protein 1;K12116
		Unigene11320	1760	osa:4350698	116	2e-10	flavin-binding kelch repeat F-box protein 1;K12116
		Unigene14139	768	osa:4350698	106	7e-13	flavin-binding kelch repeat F-box protein 1;K12116
		Unigene14632	815	osa:4350698	98	4e-09	flavin-binding kelch repeat F-box protein 1;K12116
	LKP2 (LOV kelch protein 2)	Unigene19749	546	ath:AT2G18915	103	1e-09	LKP2 (LOV kelch protein 2); K12117
		Unigene21263	1060	ath:AT2G18915	240	9e-10	LKP2 (LOV kelch protein 2); K12117
		Unigene35321	1125	ath:AT2G18915	120	1e-06	LKP2 (LOV kelch protein 2); K12117
		Unigene46429	390	ath:AT2G18915	128	8e-07	LKP2 (LOV kelch protein 2); K12117
		Unigene47495	1147	ath:AT2G18915	142	2e-08	LKP2 (LOV kelch protein 2); K12117
		Unigene49100	715	ath:AT2G18915	103	1e-09	LKP2 (LOV kelch protein 2); K12117
		Unigene63416	296	ath:AT2G18915	87	3e-06	LKP2 (LOV kelch protein 2); K12117
		Unigene70482	1693	ath:AT2G18915	120	2e-06	LKP2 (LOV kelch protein 2); K12117
		Unigene7649	393	ath:AT2G18915	89	3e-09	LKP2 (LOV kelch protein 2); K12117
		Unigene9115	1165	ath:AT2G18915	208	9e-06	LKP2 (LOV kelch protein 2); K12117
		Unigene10687	576	ath:AT2G18915	98	5e-06	LKP2 (LOV kelch protein 2); K12117
		Unigene11320	1760	ath:AT2G18915	127	1e-08	LKP2 (LOV kelch protein 2); K12117
		Unigene14139	768	ath:AT2G18915	98	6e-07	LKP2 (LOV kelch protein 2); K12117
		Unigene14632	815	ath:AT2G18915	99	7e-06	LKP2 (LOV kelch protein 2); K12117
	LHY(LATE ELONGATED HYPOCOTYL)	Unigene951	734	ath:AT1G01060	29	3e-08	LHY (LATE ELONGATED HYPOCOTYL,K12133
		Unigene10312	838	ath:AT1G01060	105	6e-08	LHY (LATE ELONGATED HYPOCOTYL,K12133
		Unigene11759	747	ath:AT1G01060	29	1e-09	LHY (LATE ELONGATED HYPOCOTYL,K12133
	CCA1(circadian clock associated 1)	Unigene951	734	ath:AT2G46830	33	6e-08	CCA1(circadian clock associated), K12134
		Unigene10312	838	ath:AT2G46830	71	2e-08	CCA1(circadian clock associated), K12134
		Unigene11759	747	ath:AT2G46830	75	7e-10	CCA1(circadian clock associated), K12134
	WNK1(serine/threonine-protein kinase WNK1)	Unigene45555	522	ath:AT3G04910	104	1e-09	K12132 serine/threonine-protein kinase WNK1 [EC:2.7.11.1]
		Unigene51912	211	osa:4343678	44	2e-07	Os07g0572800; K12132 serine/threonine-protein kinase WNK1 [EC:2.7.11.1]
		Unigene62352	283	osa:4343678	80	5e-16	Os07g0572800; K12132 serine/threonine-protein kinase WNK1 [EC:2.7.11.1]
	TOC1 (two-component response regulator-like APRR1)	Unigene61357	273	sp|Q6LA42|APRR5_ARATH	49.3	8e-06	Two-component response regulator-like APRR5 OS=Arabidopsis thaliana GN=APRR5 PE=1 SV=2
	CO (zinc finger protein CONSTANS)	Unigene64736	317	sp|Q8RWD0|COL16_ARATH	53.1	5e-07	Zinc finger protein CONSTANS-LIKE 16 OS=Arabidopsis thaliana GN=COL16 PE=2 SV=2
	CK2α (casein kinase 2, alpha polypeptide)	Unigene12607	526	vvi:100262741	88	8e-06	K03097 casein kinase 2, alpha polypeptide [EC:2.7.11.1]
		Unigene21867	1216	vvi:100262741	47.4	8e-06	K03097 casein kinase 2, alpha polypeptide [EC:2.7.11.1]
		Unigene28863	549	rcu:RCOM_0578850	35.4	7e-06	casein kinase 2, alpha polypeptide [EC:2.7.11.1]
		Unigene61208	272	sbi:SORBI_01g007270	89.7	5e-19	casein kinase 2, alpha polypeptide [EC:2.7.11.1]
		Unigene7401	420	rcu:RCOM_0578850	35	5e-06	casein kinase 2, alpha polypeptide [EC:2.7.11.1]
		Unigene9399	1438	vvi:100266111	580	1e-165	casein kinase 2, alpha polypeptide [EC:2.7.11.1]
	CK2β (casein kinase 2, beta polypeptide)	Unigene229	3614	sp|P40228|CSK2B_ARATH	288	2e-76	Casein kinase II subunit beta OS=Arabidopsis thaliana GN=CKB1 PE=1 SV=1
		Unigene48109	725	sp|P40228|CSK2B_ARATH	149	1e-48	Casein kinase II subunit beta OS=Arabidopsis thaliana GN=CKB1 PE=1 SV=1
		Unigene5735	1859	sp|P40228|CSK2B_ARATH	177	2e-43	Casein kinase II subunit beta OS=Arabidopsis thaliana GN=CKB1 PE=1 SV=1
		Unigene49360	200	osa:4334206	271	8e-09	Os03g0763000; K03097 casein kinase 2, alpha polypeptide [EC:2.7.11.1]
	APR 9 (pseudo-response regulator 9)	Unigene44659	442	ath:AT2G46790	52	2e-07	APRR9 (ARABIDOPSIS PSEUDO-RESPONSE REGULATOR 9); protein binding / transcription regulator/ two-component response regulator; K12128 pseudo-response regulator 9
		Unigene61357	273	ath:AT2G46790	45.8	9e-06	APRR9 (ARABIDOPSIS PSEUDO-RESPONSE REGULATOR 9); protein binding / transcription regulator/ two-component response regulator; K12128 pseudo-response regulator 9
	APR 7 (pseudo-response regulator 7)	Unigene32628	400	ath:AT5G02810	52	2e-07	PRR7 (PSEUDO-RESPONSE REGULATOR 7); transcription regulator/ two-component response regulator; K12129 pseudo-response regulator 7
		Unigene44659	442	ath:AT5G02810	51.2	4e-07	PRR7 (PSEUDO-RESPONSE REGULATOR 7); transcription regulator/ two-component response regulator; K12129 pseudo-response regulator 7
		Unigene45872	416	ath:AT5G02810	52	2e-07	PRR7 (PSEUDO-RESPONSE REGULATOR 7); transcription regulator/ two-component response regulator; K12129 pseudo-response regulator 7
		Unigene46535	398	ath:AT5G02810	48.1	2e-06	PRR7 (PSEUDO-RESPONSE REGULATOR 7); transcription regulator/ two-component response regulator; K12129 pseudo-response regulator 7
		Unigene49146	825	ath:AT5G02810	50.4	2e-06	PRR7 (PSEUDO-RESPONSE REGULATOR 7); transcription regulator/ two-component response regulator; K12129 pseudo-response regulator 7
		Unigene61357	273	ath:AT5G02810	48.1	2e-06	PRR7 (PSEUDO-RESPONSE REGULATOR 7); transcription regulator/ two-component response regulator; K12129 pseudo-response regulator 7
		Unigene63866	302	ath:AT5G02810	46.2	7e-06	PRR7 (PSEUDO-RESPONSE REGULATOR 7); transcription regulator/ two-component response regulator; K12129 pseudo-response regulator 7
		Unigene64736	317	ath:AT5G02810	46.2	7e-06	PRR7 (PSEUDO-RESPONSE REGULATOR 7); transcription regulator/ two-component response regulator; K12129 pseudo-response regulator 7
		Unigene65114	324	ath:AT5G02810	49.3	8e-07	PRR7 (PSEUDO-RESPONSE REGULATOR 7); transcription regulator/ two-component response regulator; K12129 pseudo-response regulator 7
		Unigene65626	335	ath:AT5G02810	52.8	7e-08	PRR7 (PSEUDO-RESPONSE REGULATOR 7); transcription regulator/ two-component response regulator; K12129 pseudo-response regulator 7
	APR 5 (pseudo-response regulator 5)	Unigene44659	442	ath:AT5G24470	50.8	5e-07	APRR5 (ARABIDOPSIS PSEUDO-RESPONSE REGULATOR 5); transcription regulator/ two-component response regulator; K12130 pseudo-response regulator 5
		Unigene61357	273	ath:AT5G24470	49.3	8e-07	APRR5 (ARABIDOPSIS PSEUDO-RESPONSE REGULATOR 5); transcription regulator/ two-component response regulator; K12130 pseudo-response regulator 5
	APR 3 (pseudo-response regulator 3)	Unigene44659	442	ath:AT5G60100	49.3	1e-06	APRR3 (ARABIDOPSIS PSEUDO-RESPONSE REGULATOR 3); transcription regulator/ two-component response regulator，K12131 pseudo-response regulator 3
	ELF3 (protein early flowering 3)	Unigene20953	505	ath:AT2G25930	154	9e-06	ELF3; ELF3 (EARLY FLOWERING 3); protein C-terminus binding / transcription factor; K12125 protein EARLY FLOWERING 3
		Unigene47649	348	ath:AT2G25930	55	7e-06	ELF3; ELF3 (EARLY FLOWERING 3); protein C-terminus binding / transcription factor; K12125 protein EARLY FLOWERING 3
Circadian rhythm - mammal	SCF (s-phase kinase-associated protein 1-like)	Unigene21586	1321	gi|301099161|ref|XP_002898672.1|	129	9e-29	S-phase kinase-associated protein 1A [Phytophthora infestans T30-4]
		Unigene59154	255	gi|301120412|ref|XP_002907933.1|	136	6e-32	S-phase kinase-associated protein 1A [Phytophthora infestans T30-4]
		Unigene7036	700	gi|301120412|ref|XP_002907933.1|	244	9e-64	S-phase kinase-associated protein 1A [Phytophthora infestans T30-4]
		Unigene16616	997	gi|159471874|ref|XP_001694081.1|	176	3e-43	ring-box protein [Chlamydomonas reinhardtii]
		Unigene56816	239	gi|159471874|ref|XP_001694081.1|	98.2	3e-20	ring-box protein [Chlamydomonas reinhardtii]
		Unigene12447	2303	cre:CHLREDRAFT_79815	65.9	2e-10	K03868 ring-box protein 1
Flavonoid biosynthesis	CHS	Unigene26912	1728	gi|299471698|emb|CBN76919.1|	785	0	Polyketide Synthase III [Ectocarpus siliculosus]
		Unigene42303	1706	gi|299471698|emb|CBN76919.1|	561	0	Polyketide Synthase III [Ectocarpus siliculosus]
		Unigene67417	390	gi|298712687|emb|CBJ48712.1|	227	3e-59	Polyketide Synthase III [Ectocarpus siliculosus]
	dihydroflavonol-4-reductase	Unigene22785	1144	ath:AT4G33360	94	2e-19	K00091 dihydroflavonol-4-reductase [EC:1.1.1.219]
		Unigene25545	1154	ath:AT4G33360	68.2	1e-11	K00091 dihydroflavonol-4-reductase [EC:1.1.1.219]
		Unigene28082	1661	rcu:RCOM_1591110	51.6	2e-06	K00091 dihydroflavonol-4-reductase [EC:1.1.1.219]
		Unigene9393	1745	ath:AT4G33360	56.6	7e-08	K00091 dihydroflavonol-4-reductase [EC:1.1.1.219]
	flavonoid 3'-hydroxylase	Unigene17348	1771	pop:POPTR_823742	97.8	3e-20	F3H1; flavonoid 3'-hydroxylase (EC:1.14.13.21)
		Unigene1623	1081	pop:POPTR_823742	80.5	3e-15	F3H1; flavonoid 3'-hydroxylase (EC:1.14.13.21)
		Unigene3413	2246	pop:POPTR_823742	80.1	8e-15	F3H1; flavonoid 3'-hydroxylase (EC:1.14.13.21)
		Unigene12201	2678	pop:POPTR_823742	78.6	3e-14	F3H1; flavonoid 3'-hydroxylase (EC:1.14.13.21)
	chalcone isomerase	Unigene30600	2189	gi|298707876|emb|CBJ30273.1|	341	2e-92	Chalcone Isomerase [Ectocarpus siliculosus]
Photomorphogenesis	COP signalosome complex subunit	Unigene21775	2131	sp|Q54PF3|CSN5_DICDI	204	3e-51	COP9 signalosome complex subunit 5 OS=Dictyostelium discoideum GN=csn5 PE=1 SV=1
		Unigene34647	668	sp|Q9FVU9|CSN5A_ARATH	115	4e-28	COP9 signalosome complex subunit 5a OS=Arabidopsis thaliana GN=CSN5A PE=1 SV=1
		Unigene16701	1817	ota:Ot05g04430	126	6e-29	COP9 signalosome, subunit CSN5 (ISS); K09613 COP9 signalosome complex subunit 5 [EC:3.4.-.-]
		Unigene1697	1251	ota:Ot05g04430	49.3	8e-06	COP9 signalosome, subunit CSN5 (ISS); K09613 COP1 signalosome complex subunit 5 [EC:3.4.-.-]
	DET1 (de-etiolated 1 )	Unigene48767	781	sp|Q99288|DET1_YEAST	112	3e-24	Putative phosphoglycerate mutase DET1 OS=Saccharomyces cerevisiae (strain ATCC 204508 / S288c) GN=DET1 PE=1 SV=1
photoreactivation	Photolyase	Unigene11093	1317	sp|Q28811|PHR_POTTR	283	2e-75	Deoxyribodipyrimidine photolyase OS=Potorous tridactylus GN=PHR PE=2 SV=1
		Unigene7340	329	sp|Q28811|PHR_POTTR	77.8	2e-14	Deoxyribodipyrimidine photolyase OS=Potorous tridactylus GN=PHR PE=2 SV=1
		Unigene19885	1131	gi|298709732|emb|CBJ31536.1|	465	1e-130	photolyase 1 [Ectocarpus siliculosus]
	DNA damage-binding protein	Unigene16340	2369	sp|Q9M0V3|DDB1A_ARATH	600	0	DNA damage-binding protein 1a OS=Arabidopsis thaliana GN=DDB1A PE=1 SV=1
		Unigene53883	222	sp|Q9M0V3|DDB1A_ARATH	68.6	1e-11	DNA damage-binding protein 1a OS=Arabidopsis thaliana GN=DDB1A PE=1 SV=1
		Unigene28248	4318	cme:CMR264C	86.3	2e-16	UV-damaged DNA binding protein; K10610 DNA damage-binding protein 1
		Unigene68694	464	sbi:SORBI_09g030580	65.9	2e-11	hypothetical protein; K10610 DNA damage-binding protein 1
		Unigene13913	489	ota:Ot10g03450	57.4	6e-09	putative UV-damaged DNA binding factor (ISS); K10610 DNA damage-binding protein 1
		Unigene14671	1646	cme:CMR264C	162	9e-40	UV-damaged DNA binding protein; K10610 DNA damage-binding protein 1
	DDB1- and CUL4-associated factor	Unigene17807	1846	sp|P61963|DCAF7_MOUSE	388	9e-107	DDB1- and CUL4-associated factor 7 OS=Mus musculus GN=Dcaf7 PE=2 SV=1
		Unigene34020	1990	sp|Q803X4|DCA13_DANRE	179	9e-109	DDB1- and CUL4-associated factor 13 OS=Danio rerio GN=dcaf13 PE=2 SV=1
		Unigene239	1911	sp|Q5M9G8|DCA11_RAT	285	8e-76	DDB1- and CUL4-associated factor 11 OS=Rattus norvegicus GN=Dcaf11 PE=2 SV=1
		Unigene53446	220	sp|P0C7V8|DC8L2_HUMAN	53.1	5e-07	DDB1- and CUL4-associated factor 8-like protein 2 OS=Homo sapiens GN=DCAF8L2 PE=2 SV=1
		Unigene58043	247	sp|Q8NA75|DC4L2_HUMAN	51.2	2e-06	DDB1- and CUL4-associated factor 4-like protein 2 OS=Homo sapiens GN=DCAF4L2 PE=1 SV=1
		Unigene70493	2137	sp|Q6PAC3|DCA13_MOUSE	465	7e-130	DDB1- and CUL4-associated factor 13 OS=Mus musculus GN=Dcaf13 PE=2 SV=1
	DET1 (de-etiolated 1 )	Unigene48767	781	sp|Q99288|DET1_YEAST	112	3e-24	Putative phosphoglycerate mutase DET1 OS=Saccharomyces cerevisiae (strain ATCC 204508 / S288c) GN=DET1 PE=1 SV=1
