# Supplementary material for: Transcriptome Sequencing and Comparative Analysis of Saccharina japonica (Laminariales, Phaeophyceae) under Blue Light Induction
Source: PLoS One. 2012 Jun 27;7(6):e39704. doi: 10.1371/journal.pone.0039704 (PMC3384632; doi:10.1371/journal.pone.0039704)
Supplement: File S8 — 28 significant differentially expressed BL-receptors unigenes in S. japonica. (XLS) [file pone.0039704.s008.xls]

## Sheet: Sheet1
File S8 28 significant differentially expressed BL-receptors unigenes S. japonica
Catalogs	Query_id	Subject_annotation	Fold	P value
Phototropin	Unigene10687	Phototropin-2 OS=Oryza sativa subsp. japonica GN=PHOT2 PE=1 SV=1	3.3452	1.3828e-59
	Unigene35321	Phototropin-2 OS=Oryza sativa subsp. japonica GN=PHOT2 PE=1 SV=1	4.1443	3.3479e-09
	Unigene47823	Phototropin-2 OS=Oryza sativa subsp. japonica GN=PHOT2 PE=1 SV=1	6.5859	1.4309e-55
	Unigene63416	Phototropin-2 OS=Oryza sativa subsp. japonica GN=PHOT2 PE=1 SV=1	11.7948	0.00032662
	Unigene70482	Phototropin-2 OS=Oryza sativa subsp. japonica GN=PHOT2 PE=1 SV=1	4.4674	3.4101e-180
	Unigene69770	Phototropin-2 OS=Oryza sativa subsp. japonica GN=PHOT2 PE=1 SV=1	13.6025	4.6344e-26
	Unigene12114	Phototropin 1; blue light photoreceptor; K08282 [EC:2.7.11.1]	1.5447	5.4207e-14
	Unigene15731	Phototropin 1; blue light photoreceptor; K08282 [EC:2.7.11.1]	1.7676	2.4972e-06
	Unigene27099	Phototropin 1; blue light photoreceptor; K08282 [EC:2.7.11.1]	2.827	3.4067e-93
	Unigene30560	Phototropin 1; blue light photoreceptor; K08282 [EC:2.7.11.1]	2.7335	3.4341e-77
	Unigene4009	Phototropin 1; blue light photoreceptor; K08282 [EC:2.7.11.1]	1.6245	2.5934e-90
	Unigene44387	Phototropin 1; blue light photoreceptor; K08282 [EC:2.7.11.1]	12.1302	2.2774e-12
	Unigene4532	Phototropin 1; blue light photoreceptor; K08282 [EC:2.7.11.1]	1.6219	3.8092e-16
	Unigene46549	Phototropin 1; blue light photoreceptor; K08282 [EC:2.7.11.1]	4.1311	4.1695e-25
	Unigene66881	Phototropin 1; blue light photoreceptor; K08282 [EC:2.7.11.1]	2.2077	0.00011995
	Unigene69028	Phototropin 1; blue light photoreceptor; K08282 [EC:2.7.11.1]	12.4251	9.5323e-10
	Unigene70432	Phototropin 1; blue light photoreceptor; K08282 [EC:2.7.11.1]	2.7632	1.3769e-32
Cryptochrome	Unigene16798	Cryptochrome DASH OS=Natronomonas pharaonis GN=cry PE=3 SV=1	1.85	2.0417e-21
	Unigene22061	cryptochrome photoreceptor [Chlamydomonas smithii]	1.1294	2.6902e-44
	Unigene43965	cryptochrome photoreceptor [Chlamydomonas smithii]	2.0501	1.8681e-05
	Unigene46375	cryptochrome photoreceptor [Chlamydomonas smithii]	3.5592	2.299e-08
Aureochrome	Unigene49100	Aureochrome 1 [Ectocarpus siliculosus]	4.2015	3.9927e-18
	Unigene66471	Aureochrome 1 [Ectocarpus siliculosus]	3.2922	1.1971e-08
	Unigene11320	Aureochrome 2 [Ectocarpus siliculosus]	2.5772	0
	Unigene54592	Aureochrome 2 [Ectocarpus siliculosus]	12.2995	0.000167
	Unigene19749	Aureochrome 3 [Ectocarpus siliculosus]	1.9765	1.735e-08
	Unigene14139	Aureochrome 4 [Ectocarpus siliculosus]	1.7123	1.8704e-11
BL receptor in Bacteria	Unigene47495	Blue-light photoreceptor OS=Listeria innocua GN=lin0792 PE=3 SV=1	13.6307	4.495e-49
Limitations of all differentially expressed genes are based on P value < 0.05 and FDR ≤ 0.001which indicated the unigene was significantly altered after BL exposure. The absolute value of “Fold” means the magnitude of up- or downregulation for each gene/homolog after bacterial challenge; “+” indicates upregulation and “-” indicates downregulation.
